# Supplementary material for: Ultrasensitive dual amplification sandwich immunosensor for breast cancer susceptibility gene based on sheet materials
Source: Royal Society of Chemistry journal article supplement (doi:10.1039/c4an00099d), 2014-01-01
Supplement: c4an00099d1.pdf [file c4an00099d1.pdf]

**Ultrasensitive dual amplification sandwich immunosensor  
for breast cancer susceptibility gene based on sheet  
materials**

Xiang Ren,<sup>a</sup> Tao Yan,<sup>a</sup> Sen Zhang,<sup>b</sup> Xiaoyue Zhang,<sup>a</sup> Picheng Gao,<sup>a</sup> Dan  
Wu,<sup>a</sup> Bin Du,<sup>a,b</sup> Qin Wei<sup>a,\*</sup>

<sup>a</sup> Key Laboratory of Chemical Sensing & Analysis in Universities of  
Shandong, School of Chemistry and Chemical Engineering, University of  
Jinan, Jinan 250022, P.R. China

<sup>b</sup> School of Resources and Environmental Sciences, University of Jinan,  
Jinan 250022, PRChina

Correspondence: [sdjndxwq@163.com](mailto:sdjndxwq@163.com) (Qin Wei)

Tel: + 86-531-82767872

Fax: + 86-531-82765969

Fig. S1 cyclic voltammogram about electrochemical response before (A) and after (B) the addition of  $H_2O_2$

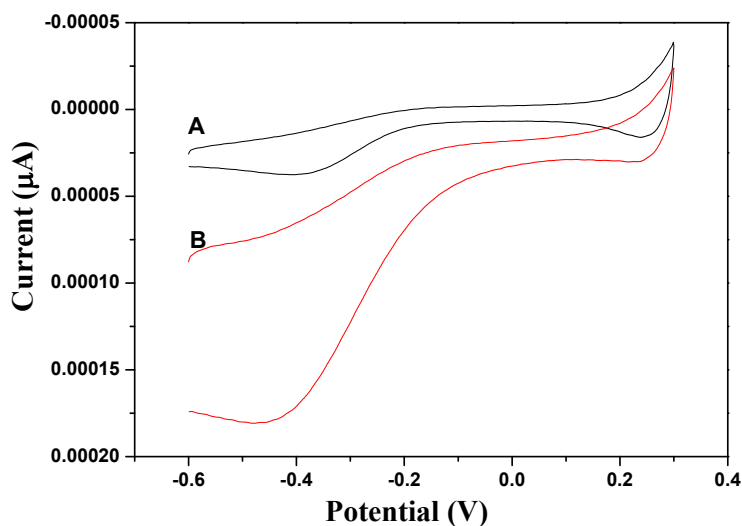

Fig. S2 the current data towards different BRCA1 concentration

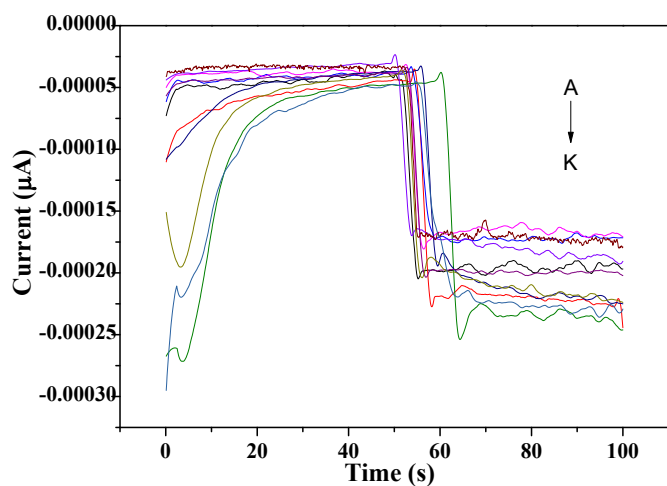

In Fig. S2, A is the background current, and from B to K is the current of different BRCA1 concentration. And in optimization of experimental conditions and calibration curve, the data presented in figures were without background current.
